# Supplementary material for: Public perceptions of the health risks of extreme heat across US states, counties, and neighborhoods
Source: PubMed Central journal article supplement — Proc Natl Acad Sci U S A. 2019 Mar 12;116(14):6743–8. doi: 10.1073/pnas.1813145116 (PMC6452713; doi:10.1073/pnas.1813145116), 2019-03-12
Supplement: pnas.1813145116.sapp.pdf [file pnas.1813145116.sapp.pdf]

1

## 2 **Supplementary Information for**

### 3 **Public perceptions of the health risks of extreme heat across U.S. states, counties, and** 4 **neighborhoods**

5 **Peter D. Howe, Jennifer R. Marlon, Xinran Wang, Anthony Leiserowitz**

6 **Peter D. Howe**

7 **E-mail: [peter.howe@usu.edu](mailto:peter.howe@usu.edu)**

#### 8 **This PDF file includes:**

9     Supplementary text

10    Figs. S1 to S22

11    Tables S1 to S8

12    References for SI reference citations

## 13 Supporting Information Text

14 **Survey details.** The survey data were collected via the GfK Knowledgepanel, a U.S. national probability-based online panel.  
15 Panel members are recruited by telephone using random digit dial probability sampling methods and persons recruited who  
16 do not have internet access are provided access by GfK. Questions were included on the Knowledgepanel Omnibus survey, a  
17 shared-cost national survey that includes questions from multiple clients and is conducted weekly with a sample of 1000 U.S.  
18 adults (age 18 and over). Our survey items were included on 10 survey waves every two weeks, beginning on 13 June 2015 and  
19 concluding on 17 October 2015 (Table S1). Each wave was fielded for three days.

20 We included nine questions measuring heat risk perceptions, composed of three questions and three sub-questions. Questions  
21 were designed to measure three constructs related to heat risk perception: perceived probability of harm, perceived severity of  
22 harm, and worry or concern about the hazard. Responses to each question were indicated with a labeled slider bar on a 0-100  
23 scale, with labels placed at 0, 25, 50, 75, and 100. Respondents could answer by moving the slider to any integer on the scale.  
24 In addition to the slider bar, Question 1 also included a separate response option for "Will not be harmed because a heat wave  
25 will not occur." Questions were as follows:

26 1. A heat wave is a period of unusually and uncomfortably hot weather. Thinking about your local area, how likely is it, if  
27 at all, that each of the following will be harmed by a heat wave in the next five years? If you're not sure, just give your best  
28 estimate.

29 A. Your health [Definitely will not be harmed; About a 25% chance of harm; About a 50-50 chance of harm; About a 75%  
30 chance of harm; Definitely will be harmed]

31 B. The health of others in your family [Definitely will not be harmed; About a 25% chance of harm; About a 50-50 chance  
32 of harm; About a 75% chance of harm; Definitely will be harmed]

33 C. The health of others in your community [Definitely will not be harmed; About a 25% chance of harm; About a 50-50  
34 chance of harm; About a 75% chance of harm; Definitely will be harmed]

35 2. If a heat wave were to occur in your local area, how much, if at all, do you think it would harm the following?

36 A. Your health [Would cause no harm at all; A little harm; Moderate harm; A great deal of harm; Would cause extreme  
37 harm]

38 B. The health of others in your family [Would cause no harm at all; A little harm; Moderate harm; A great deal of harm;  
39 Would cause extreme harm]

40 C. The health of others in your community [Would cause no harm at all; A little harm; Moderate harm; A great deal of  
41 harm; Would cause extreme harm]

42 3. How worried, if at all, are you about the effects of heat waves on the following?

43 A. Your health [Not worried at all; A little worried; Moderately worried; Very worried; Extremely worried]

44 B. The health of others in your family [Not worried at all; A little worried; Moderately worried; Very worried; Extremely  
45 worried]

46 A. The health of others in your community [Not worried at all; A little worried; Moderately worried; Very worried; Extremely  
47 worried]

48 **Model development.** Although there is a strong theoretical basis for selecting several sociodemographic factors in a model of  
49 heat wave risk perceptions, census and other datasets provide many different measures of most factors. We used Random Forest  
50 (RF) analysis to identify potential predictors for inclusion in our model. RF ranks variables by their predictive importance,  
51 which we compared for four indices including personal harm, harm to one's family, and community harm, and an overall risk  
52 perception index that combined these three, resulting in four indices. We also compared the RF results for both binary and  
53 continuous outcomes, resulting in a total of eight indices. Age, race/ethnicity, education, disability, various measures of income,  
54 temperature, and the proportion of impervious surfaces in the tract consistently ranked among the top ten predictors in the  
55 RF analysis. Model selection proceeded by comparing predictions and errors across the reduced variable sets identified from  
56 the RF analysis.

57 **A. Model specification.** We specify our model as follows, predicting heat risk perceptions ( $y$ ) for each individual  $i$ :

$$y_i \sim N\left(\gamma^0 + \alpha_{j[i]}^{\text{race}} + \alpha_{k[i]}^{\text{age}} + \alpha_{l[i]}^{\text{gender}} + \alpha_{j[i],k[i],l[i]}^{\text{race.age.gender}} + \alpha_{t[i]}^{\text{tract}}, \sigma_y^2\right),$$

58 where

$$\begin{aligned}
\alpha_j^{\text{race}} &\sim N(0, \sigma_{\text{race}}^2) \text{ for } j = 1, \dots, 5 \\
\alpha_k^{\text{age}} &\sim N(0, \sigma_{\text{age}}^2) \text{ for } k = 1, \dots, 10 \\
\alpha_l^{\text{gender}} &\sim N(0, \sigma_{\text{gender}}^2) \text{ for } l = 1, 2 \\
\alpha_{j,k,l}^{\text{race.age.gender}} &\sim N(0, \sigma_{\text{race.age.gender}}^2) \text{ for } \\
& j = 1, \dots, 5; k = 1, \dots, 10; l = 1, 2 \\
\alpha_t^{\text{tract}} &\sim N(\alpha_{r[t]}^{\text{region}} + \alpha_{s[t]}^{\text{state}} + \alpha_{c[t]}^{\text{county}} + \gamma^{\text{tmean}} \text{tmean}_t + \\
& \gamma^{\text{landcover}} \text{landcover}_t + \gamma^{\text{education}} \text{education}_t + \gamma^{\text{lowincome}} \text{lowincome}_t + \\
& + \gamma^{\text{disability65}} \text{disability65}_t, \sigma_{\text{tract}}^2) \text{ for } t = 1, \dots, 6994 \\
\alpha_r^{\text{division}} &\sim N(0, \sigma_{\text{division}}^2) \text{ for } r = 1, \dots, 9 \\
\alpha_s^{\text{state}} &\sim N(0, \sigma_{\text{state}}^2) \text{ for } s = 1, \dots, 51 \\
\alpha_c^{\text{county}} &\sim N(0, \sigma_{\text{county}}^2) \text{ for } c = 1, \dots, 1524
\end{aligned}$$

59 **Model validation surveys.** We conducted two additional sets of independent surveys to validate our model estimates. One set  
60 of surveys was targeted to the state level, while the other was targeted to the census tract level.

61 The state-level surveys were conducted using Google Consumer Surveys, an online survey tool that can sample the Internet-  
62 using population at relatively low cost compared to telephone, mail, or Internet panel survey methods. GCS samples Internet  
63 users on sites that are part of Google's advertising network, such as local newspapers. In a typical use case, respondents may  
64 opt to answer one to ten survey questions to access site content instead of purchasing the content or viewing ads. Survey  
65 weights are applied based on census Current Population Survey frequencies for respondents' inferred demographic categories,  
66 including age, gender, and location. This platform has been shown to achieve similar accuracy to traditional survey research  
67 techniques (1-3).

68 For the state-level surveys, eight states were selected by stratifying all 50 states and the District of Columbia into population  
69 quartiles, and randomly selecting two states within each quartile. Selected states were Indiana, Minnesota, New Mexico,  
70 Oklahoma, Pennsylvania, Rhode Island, South Carolina, and Washington. We targeted a sample of at least 500 respondents in  
71 each selected state. Surveys were fielded in May and June 2016.

72 The state-level validation surveys were conducted using a single question (analogous to question 1A in our primary survey),  
73 which we adapted for Google Consumer Surveys' word limit and response option format:

74 1. A heat wave is a period of unusually and uncomfortably hot weather. If a heat wave were to occur in your area, how  
75 much, if at all, do you think it would harm your health? [No harm at all; A little harm; Moderate harm; A great deal of harm;  
76 Extreme harm]

77 Compared against these state-level surveys, the mean absolute error of our MRP model estimates was 1.6 points, and the  
78 correlation of the model estimates to the state-level survey results was  $r=0.82$  (Fig. S1).

79 Our second set of validation surveys was conducted at the census tract level. The tract-level surveys were conducted via a  
80 combined mail and online design following the Tailored Design Method (4). Tracts were selected by stratifying all U.S. counties  
81 with heat-related mortality statistics recorded in the CDC WONDER database into those with above- and below-average per  
82 capita mortality and above- and below-average risk perceptions. One county was then randomly selected from each of the two  
83 groups that had higher-than-average heat-related deaths and either lower- or higher-than average risk perceptions. That is, one  
84 county had high heat-related deaths and higher-than-average risk perceptions (Imperial County, CA), and the other had high  
85 heat-related deaths and lower-than-average risk perceptions (Peoria County, IL). One census tract was then randomly selected  
86 within each of the two counties. Mailing addresses were then randomly sampled within each tract. Of 3600 total mailing  
87 addresses sampled, we received 756 completed surveys, for an overall response rate of 21%. Respondents were first contacted  
88 to participate in the online survey via postal mail, which included a 2 dollar incentive. Nonrespondents were sent reminders  
89 and paper versions of the survey, with up to two reminders and paper surveys mailed. The surveys were provided in both  
90 English and Spanish. The tract-level surveys replicated the survey questionnaire wording from the primary national survey,  
91 with supplementary demographic questions and several related questions on behaviors and experiences related to heat waves  
92 following the risk perception items. The tract-level surveys were fielded in July-September 2016.

93 **Comparing heat risk perceptions to heat mortality statistics.** Heat-related mortality data are available at the state level (5),  
94 which allows for a comparison between recent mortality and risk perception estimates. There is a positive relationship between  
95 risk perception and mortality from 1999-2015 (Supplementary Fig. 2) ( $r=0.57$ ). Most states in the South have higher risk  
96 perceptions than would be predicted by their per capita mortality, while most states in the Midwest have lower risk perceptions  
97 than would be predicted by their mortality rate. These patterns may indicate adaptation in states with high risk perceptions  
98 and lower than expected mortality. For example, the heat risk perception index is 10 points higher in California than Wisconsin,  
99 yet mortality is similar in the two states (0.2 per 100,000) despite greater population exposure to extreme heat in California.  
100 Similarly, mortality is comparable between Texas and Kansas (0.3 per 100,000), yet the heat risk perception index is 7.5 points  
101 higher in Texas.

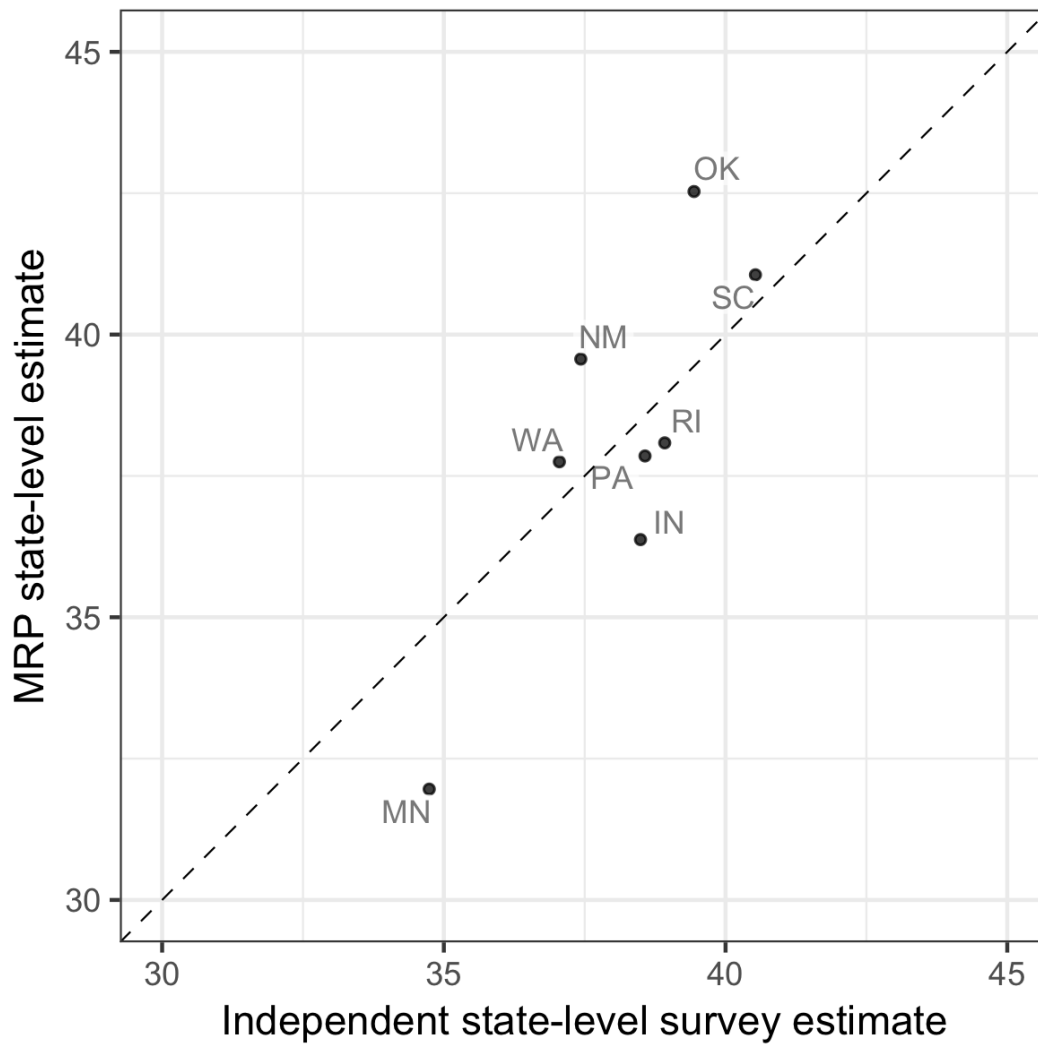

**Fig. S1.** External validation comparison of estimated risk perception index with mean-centered independent survey estimates in eight randomly selected states. The mean absolute difference between MRP model estimates and the external survey results was 1.6 points. Estimates were correlated at  $r=0.82$ .

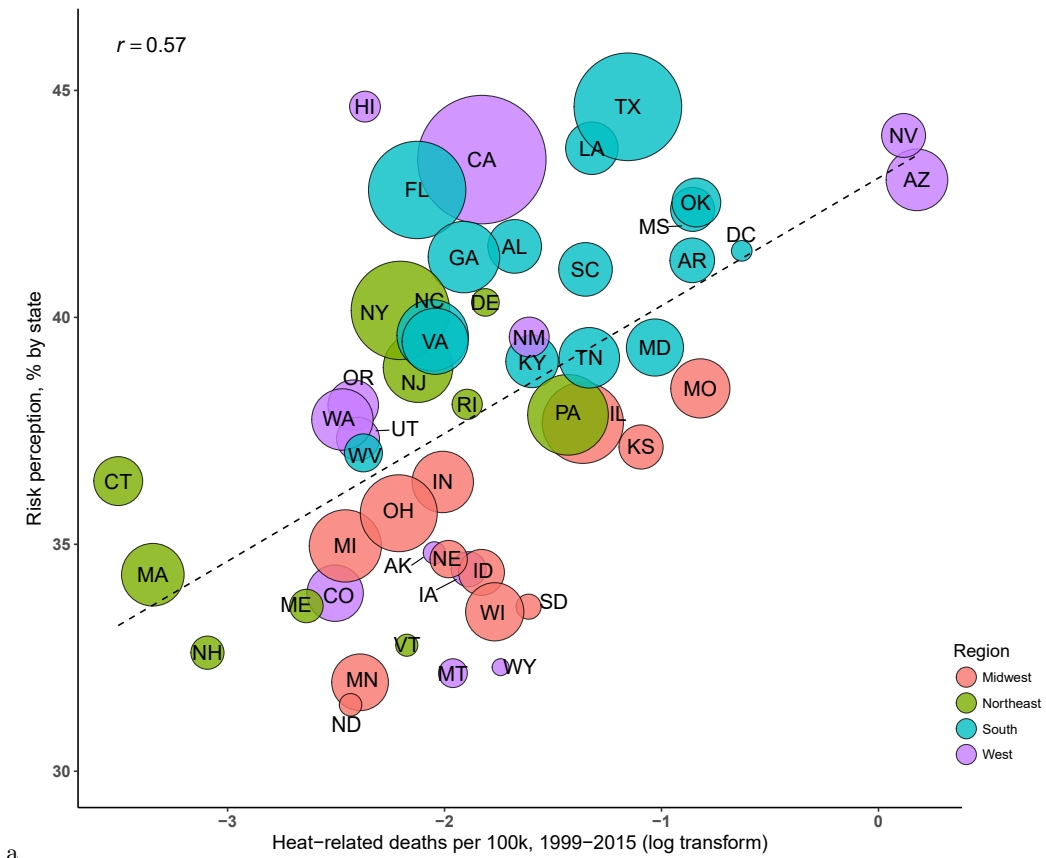

Fig. S2. Risk perception as compared to heat-related mortality (MCD-ICD 10 code T67) at the state level, 1999-2015 (5).

**Table S1. National survey dates**

| Wave | Survey dates         |
|------|----------------------|
| 1.   | 12-14 June 2015      |
| 2.   | 26-28 June 2015      |
| 3.   | 10-12 July 2015      |
| 4.   | 24-26 July 2015      |
| 5.   | 7-9 August 2015      |
| 6.   | 21-23 August 2015    |
| 7.   | 4-6 September 2015   |
| 8.   | 18-20 September 2015 |
| 9.   | 2-4 October 2015     |
| 10.  | 16-18 October 2015   |

**Table S2. Multilevel regression model tract-level fixed effects conditional point estimates and standard errors**

|                                                        | <i>Fixed effect coefficient:</i> |                   |
|--------------------------------------------------------|----------------------------------|-------------------|
|                                                        | Scaled                           | Unscaled          |
| Mean daily summer (JJA) temperature (°C)               | 2.698<br>(0.429)                 | 0.519<br>(0.082)  |
| Mean percent impervious surface                        | 1.101<br>(0.372)                 | 0.051<br>(0.017)  |
| Percent of adult pop. with bachelors degree or higher  | -1.158<br>(0.424)                | -0.064<br>(0.023) |
| Percent of adult pop. receiving SNAP benefits          | 1.553<br>(0.517)                 | 0.147<br>(0.049)  |
| Percent of pop. age 65 and over with disability status | 0.236<br>(0.366)                 | 0.020<br>(0.031)  |
| Intercept                                              | 41.653<br>(2.377)                |                   |

*Note: Standard errors in parentheses. Scaled variables have been mean-centered and divided by their standard deviations.*

**Table S3. Modeled conditional point estimates and standard errors for age random effect**

|                   | Intercept | Std. error |
|-------------------|-----------|------------|
| 18-19 years       | -0.669    | 0.831      |
| 20-24 years       | -0.311    | 0.686      |
| 25-29 years       | -0.039    | 0.692      |
| 30-34 years       | -0.236    | 0.684      |
| 35-44 years       | -1.300    | 0.595      |
| 45-54 years       | 0.509     | 0.618      |
| 55-64 years       | 1.296     | 0.593      |
| 65-74 years       | 0.633     | 0.662      |
| 75-84 years       | 0.247     | 0.804      |
| 85 years and over | -0.129    | 0.946      |



**Table S4. Modeled conditional point estimates and standard errors for race/ethnicity random effect**

|                        | Intercept | Std. error |
|------------------------|-----------|------------|
| 2+ Races, Non-Hispanic | -0.478    | 1.516      |
| Black, Non-Hispanic    | 0.292     | 1.322      |
| Hispanic or Latino/a   | 0.792     | 1.279      |
| Other, Non-Hispanic    | 3.361     | 1.450      |
| White, Non-Hispanic    | -3.966    | 1.116      |

**Table S5. Modeled conditional point estimates and standard errors for gender random effect**

|        | Intercept | Std. error |
|--------|-----------|------------|
| Female | 2.379     | 1.176      |
| Male   | -2.379    | 1.179      |

**Table S6. Modeled conditional point estimates and standard errors for gender by race/ethnicity by age interaction random effect**

|                                              | Intercept | Std. error |
|----------------------------------------------|-----------|------------|
| Female:2+ Races, Non-Hispanic:18-19 years    | 0.003     | 0.156      |
| Female:2+ Races, Non-Hispanic:20-24 years    | -0.002    | 0.156      |
| Female:2+ Races, Non-Hispanic:25-29 years    | -0.003    | 0.156      |
| Female:2+ Races, Non-Hispanic:30-34 years    | -0.001    | 0.156      |
| Female:2+ Races, Non-Hispanic:35-44 years    | -0.003    | 0.156      |
| Female:2+ Races, Non-Hispanic:45-54 years    | -0.003    | 0.156      |
| Female:2+ Races, Non-Hispanic:55-64 years    | 0.001     | 0.156      |
| Female:2+ Races, Non-Hispanic:65-74 years    | -0.001    | 0.156      |
| Female:2+ Races, Non-Hispanic:75-84 years    | -0.0003   | 0.156      |
| Female:Black, Non-Hispanic:18-19 years       | 0.001     | 0.156      |
| Female:Black, Non-Hispanic:20-24 years       | -0.003    | 0.156      |
| Female:Black, Non-Hispanic:25-29 years       | 0.0001    | 0.156      |
| Female:Black, Non-Hispanic:30-34 years       | -0.007    | 0.156      |
| Female:Black, Non-Hispanic:35-44 years       | -0.010    | 0.156      |
| Female:Black, Non-Hispanic:45-54 years       | 0.011     | 0.156      |
| Female:Black, Non-Hispanic:55-64 years       | 0.001     | 0.156      |
| Female:Black, Non-Hispanic:65-74 years       | 0.004     | 0.156      |
| Female:Black, Non-Hispanic:75-84 years       | 0.003     | 0.156      |
| Female:Hispanic:18-19 years                  | -0.003    | 0.156      |
| Female:Hispanic:20-24 years                  | -0.014    | 0.156      |
| Female:Hispanic:25-29 years                  | -0.002    | 0.156      |
| Female:Hispanic:30-34 years                  | -0.012    | 0.156      |
| Female:Hispanic:35-44 years                  | -0.011    | 0.156      |
| Female:Hispanic:45-54 years                  | 0.002     | 0.156      |
| Female:Hispanic:55-64 years                  | 0.007     | 0.156      |
| Female:Hispanic:65-74 years                  | 0.012     | 0.156      |
| Female:Hispanic:85 years and over            | -0.001    | 0.156      |
| Female:Other, Non-Hispanic:18-19 years       | -0.004    | 0.156      |
| Female:Other, Non-Hispanic:20-24 years       | 0.014     | 0.156      |
| Female:Other, Non-Hispanic:25-29 years       | 0.004     | 0.156      |
| Female:Other, Non-Hispanic:30-34 years       | 0.001     | 0.156      |
| Female:Other, Non-Hispanic:35-44 years       | -0.004    | 0.156      |
| Female:Other, Non-Hispanic:45-54 years       | -0.0002   | 0.156      |
| Female:Other, Non-Hispanic:55-64 years       | 0.001     | 0.156      |
| Female:Other, Non-Hispanic:65-74 years       | -0.009    | 0.156      |
| Female:Other, Non-Hispanic:75-84 years       | -0.0001   | 0.156      |
| Female:White, Non-Hispanic:18-19 years       | -0.013    | 0.156      |
| Female:White, Non-Hispanic:20-24 years       | 0.012     | 0.156      |
| Female:White, Non-Hispanic:25-29 years       | 0.009     | 0.156      |
| Female:White, Non-Hispanic:30-34 years       | 0.005     | 0.156      |
| Female:White, Non-Hispanic:35-44 years       | -0.024    | 0.155      |
| Female:White, Non-Hispanic:45-54 years       | -0.004    | 0.155      |
| Female:White, Non-Hispanic:55-64 years       | 0.024     | 0.155      |
| Female:White, Non-Hispanic:65-74 years       | 0.015     | 0.155      |
| Female:White, Non-Hispanic:75-84 years       | 0.010     | 0.156      |
| Female:White, Non-Hispanic:85 years and over | 0.002     | 0.156      |
| Male:2+ Races, Non-Hispanic:18-19 years      | 0.001     | 0.156      |
| Male:2+ Races, Non-Hispanic:20-24 years      | 0.001     | 0.156      |
| Male:2+ Races, Non-Hispanic:25-29 years      | 0.001     | 0.156      |
| Male:2+ Races, Non-Hispanic:30-34 years      | 0.002     | 0.156      |
| Male:2+ Races, Non-Hispanic:35-44 years      | -0.001    | 0.156      |
| Male:2+ Races, Non-Hispanic:45-54 years      | 0.009     | 0.156      |
| Male:2+ Races, Non-Hispanic:55-64 years      | -0.007    | 0.156      |
| Male:2+ Races, Non-Hispanic:65-74 years      | 0.001     | 0.156      |
| Male:2+ Races, Non-Hispanic:75-84 years      | 0.001     | 0.156      |
| Male:Black, Non-Hispanic:18-19 years         | -0.005    | 0.156      |
| Male:Black, Non-Hispanic:20-24 years         | -0.003    | 0.156      |
| Male:Black, Non-Hispanic:25-29 years         | 0.010     | 0.156      |

|                                            | Intercept | Std. error |
|--------------------------------------------|-----------|------------|
| Male:Black, Non-Hispanic:30-34 years       | -0.008    | 0.156      |
| Male:Black, Non-Hispanic:35-44 years       | -0.007    | 0.156      |
| Male:Black, Non-Hispanic:45-54 years       | 0.018     | 0.156      |
| Male:Black, Non-Hispanic:55-64 years       | -0.007    | 0.156      |
| Male:Black, Non-Hispanic:65-74 years       | 0.002     | 0.156      |
| Male:Black, Non-Hispanic:75-84 years       | 0.002     | 0.156      |
| Male:Black, Non-Hispanic:85 years and over | -0.002    | 0.156      |
| Male:Hispanic:18-19 years                  | -0.002    | 0.156      |
| Male:Hispanic:20-24 years                  | 0.001     | 0.156      |
| Male:Hispanic:25-29 years                  | 0.010     | 0.156      |
| Male:Hispanic:30-34 years                  | 0.011     | 0.156      |
| Male:Hispanic:35-44 years                  | 0.001     | 0.156      |
| Male:Hispanic:45-54 years                  | -0.003    | 0.156      |
| Male:Hispanic:55-64 years                  | 0.006     | 0.156      |
| Male:Hispanic:65-74 years                  | 0.002     | 0.156      |
| Male:Hispanic:75-84 years                  | -0.001    | 0.156      |
| Male:Other, Non-Hispanic:18-19 years       | -0.007    | 0.156      |
| Male:Other, Non-Hispanic:20-24 years       | 0.005     | 0.156      |
| Male:Other, Non-Hispanic:25-29 years       | 0.002     | 0.156      |
| Male:Other, Non-Hispanic:30-34 years       | -0.005    | 0.156      |
| Male:Other, Non-Hispanic:35-44 years       | 0.013     | 0.156      |
| Male:Other, Non-Hispanic:45-54 years       | 0.001     | 0.156      |
| Male:Other, Non-Hispanic:55-64 years       | -0.001    | 0.156      |
| Male:Other, Non-Hispanic:65-74 years       | -0.001    | 0.156      |
| Male:Other, Non-Hispanic:75-84 years       | -0.000    | 0.156      |
| Male:White, Non-Hispanic:18-19 years       | 0.012     | 0.156      |
| Male:White, Non-Hispanic:20-24 years       | -0.020    | 0.156      |
| Male:White, Non-Hispanic:25-29 years       | -0.032    | 0.156      |
| Male:White, Non-Hispanic:30-34 years       | 0.008     | 0.156      |
| Male:White, Non-Hispanic:35-44 years       | 0.013     | 0.155      |
| Male:White, Non-Hispanic:45-54 years       | -0.018    | 0.155      |
| Male:White, Non-Hispanic:55-64 years       | 0.008     | 0.155      |
| Male:White, Non-Hispanic:65-74 years       | -0.008    | 0.155      |
| Male:White, Non-Hispanic:75-84 years       | -0.009    | 0.156      |
| Male:White, Non-Hispanic:85 years and over | -0.003    | 0.156      |

**Table S7. Modeled conditional point estimates and standard errors for census division random effect**

|                    | Intercept | Std. error |
|--------------------|-----------|------------|
| East-North Central | -1.279    | 0.852      |
| East-South Central | 0.221     | 1.047      |
| Mid-Atlantic       | 0.356     | 0.907      |
| Mountain           | -0.691    | 0.998      |
| New England        | -0.792    | 1.082      |
| Pacific            | 2.625     | 0.935      |
| South Atlantic     | 0.500     | 0.812      |
| West-North Central | -1.499    | 0.960      |
| West-South Central | 0.557     | 0.964      |

**Table S8. Modeled conditional point estimates and standard errors for state random effect**

| StateFP | State_name           | Intercept | Std. error |
|---------|----------------------|-----------|------------|
| 01      | Alabama              | 0.238     | 0.764      |
| 02      | Alaska               | -0.101    | 0.792      |
| 04      | Arizona              | -0.200    | 0.761      |
| 05      | Arkansas             | 0.086     | 0.771      |
| 06      | California           | 0.388     | 0.709      |
| 08      | Colorado             | -0.158    | 0.759      |
| 09      | Connecticut          | 0.167     | 0.771      |
| 10      | Delaware             | 0.207     | 0.786      |
| 11      | District of Columbia | 0.019     | 0.790      |
| 12      | Florida              | -0.402    | 0.691      |
| 13      | Georgia              | 0.028     | 0.726      |
| 15      | Hawaii               | -0.016    | 0.789      |
| 16      | Idaho                | 0.037     | 0.779      |
| 17      | Illinois             | 0.175     | 0.727      |
| 18      | Indiana              | 0.321     | 0.748      |
| 19      | Iowa                 | 0.069     | 0.766      |
| 20      | Kansas               | -0.280    | 0.770      |
| 21      | Kentucky             | -0.049    | 0.762      |
| 22      | Louisiana            | 0.165     | 0.765      |
| 23      | Maine                | 0.127     | 0.781      |
| 24      | Maryland             | -0.043    | 0.753      |
| 25      | Massachusetts        | -0.557    | 0.756      |
| 26      | Michigan             | -0.422    | 0.722      |
| 27      | Minnesota            | -0.423    | 0.744      |
| 28      | Mississippi          | 0.149     | 0.776      |
| 29      | Missouri             | 0.521     | 0.752      |
| 30      | Montana              | 0.082     | 0.788      |
| 31      | Nebraska             | -0.324    | 0.774      |
| 32      | Nevada               | 0.108     | 0.780      |
| 33      | New Hampshire        | -0.120    | 0.785      |
| 34      | New Jersey           | -0.120    | 0.740      |
| 35      | New Mexico           | 0.033     | 0.780      |
| 36      | New York             | -0.169    | 0.715      |
| 37      | North Carolina       | -0.231    | 0.726      |
| 38      | North Dakota         | -0.060    | 0.788      |
| 39      | Ohio                 | -0.190    | 0.715      |
| 40      | Oklahoma             | -0.036    | 0.770      |
| 41      | Oregon               | 0.042     | 0.763      |
| 42      | Pennsylvania         | 0.387     | 0.715      |
| 44      | Rhode Island         | 0.132     | 0.789      |
| 45      | South Carolina       | 0.046     | 0.759      |
| 46      | South Dakota         | 0.085     | 0.788      |
| 47      | Tennessee            | -0.277    | 0.758      |
| 48      | Texas                | -0.062    | 0.719      |
| 49      | Utah                 | -0.052    | 0.769      |
| 50      | Vermont              | 0.035     | 0.791      |
| 51      | Virginia             | 0.687     | 0.725      |
| 53      | Washington           | 0.409     | 0.748      |
| 54      | West Virginia        | -0.174    | 0.777      |
| 55      | Wisconsin            | -0.235    | 0.735      |
| 56      | Wyoming              | -0.041    | 0.794      |



Los Angeles County, California

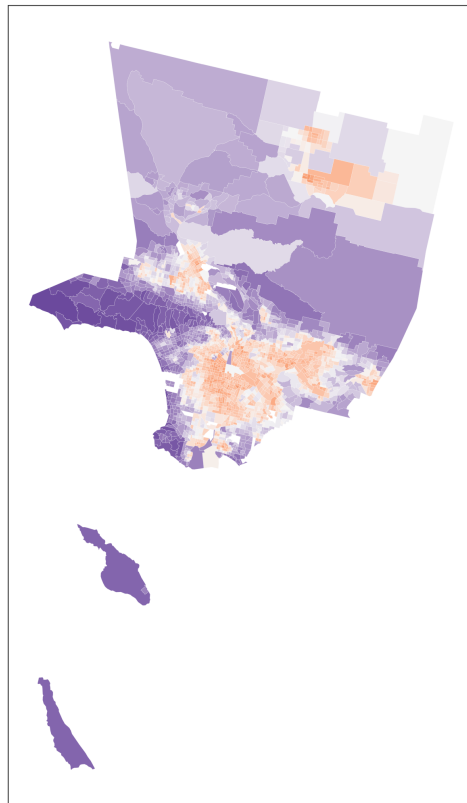

Difference from county average (County average: 47 | US average: 40)

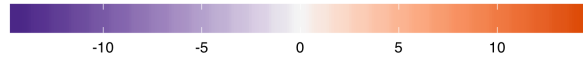

**Fig. S3.** Tract level estimates of heat risk perception for Los Angeles County, CA. Tracts are shaded by the difference from the average for the county.



Cook County, Illinois

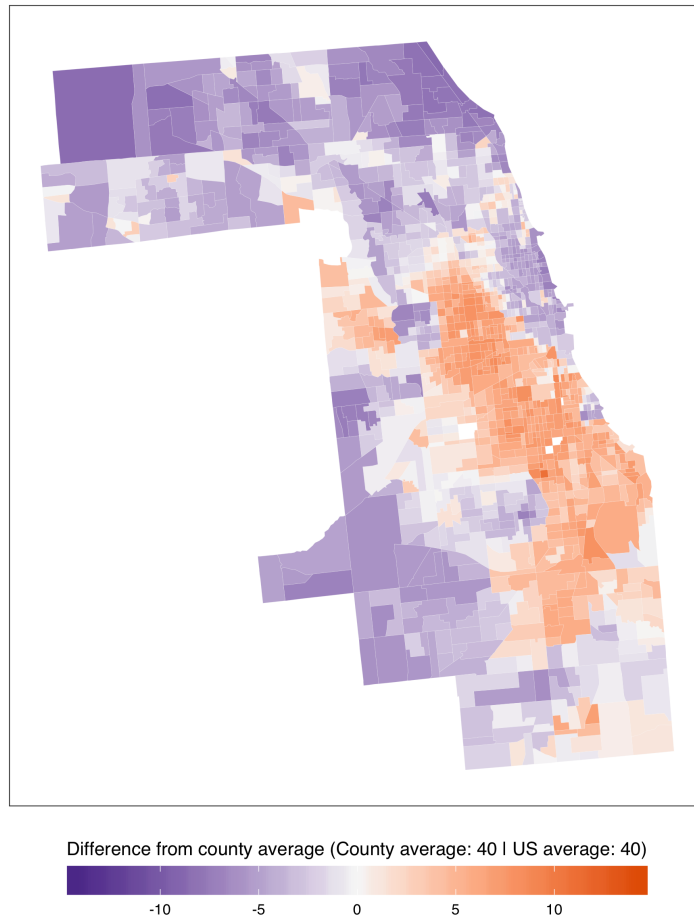

**Fig. S4.** Tract level estimates of heat risk perception for Cook County, IL. Tracts are shaded by the difference from the average for the county.

Harris County, Texas

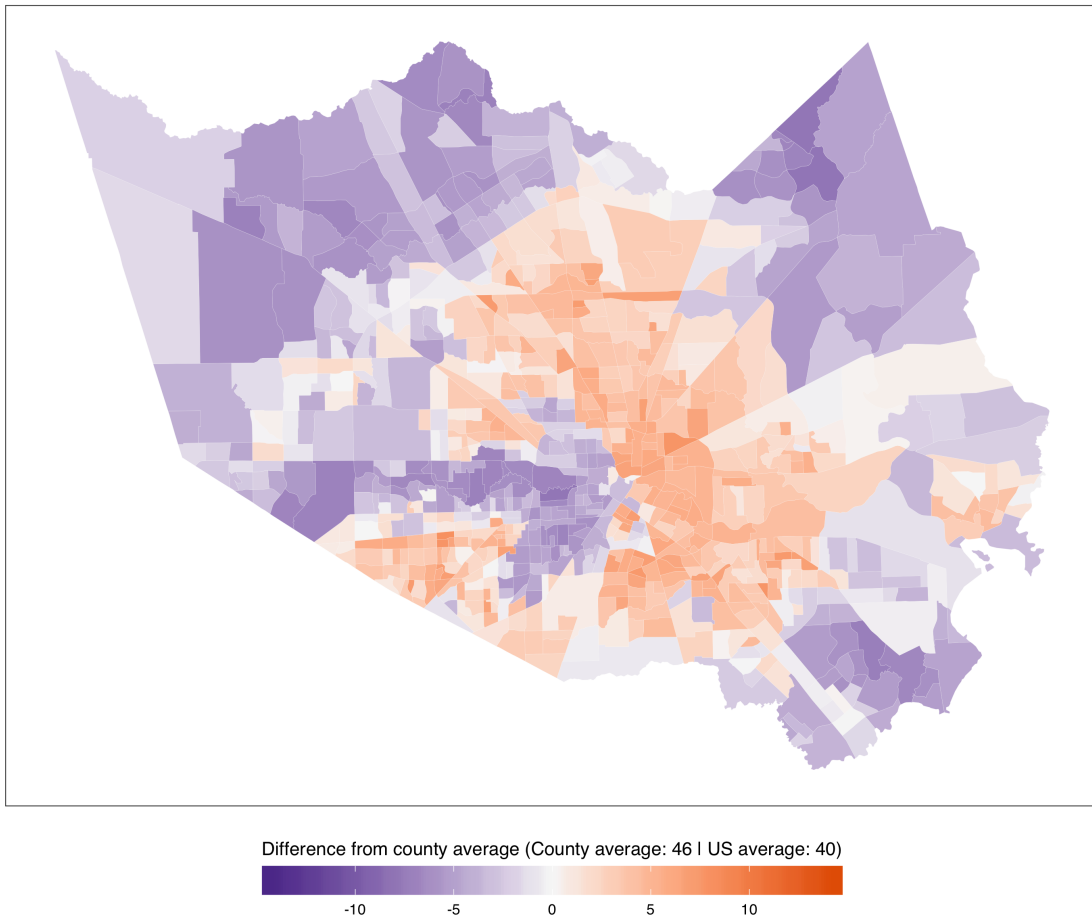

**Fig. S5.** Tract level estimates of heat risk perception for Harris County, TX. Tracts are shaded by the difference from the average for the county.

Maricopa County, Arizona

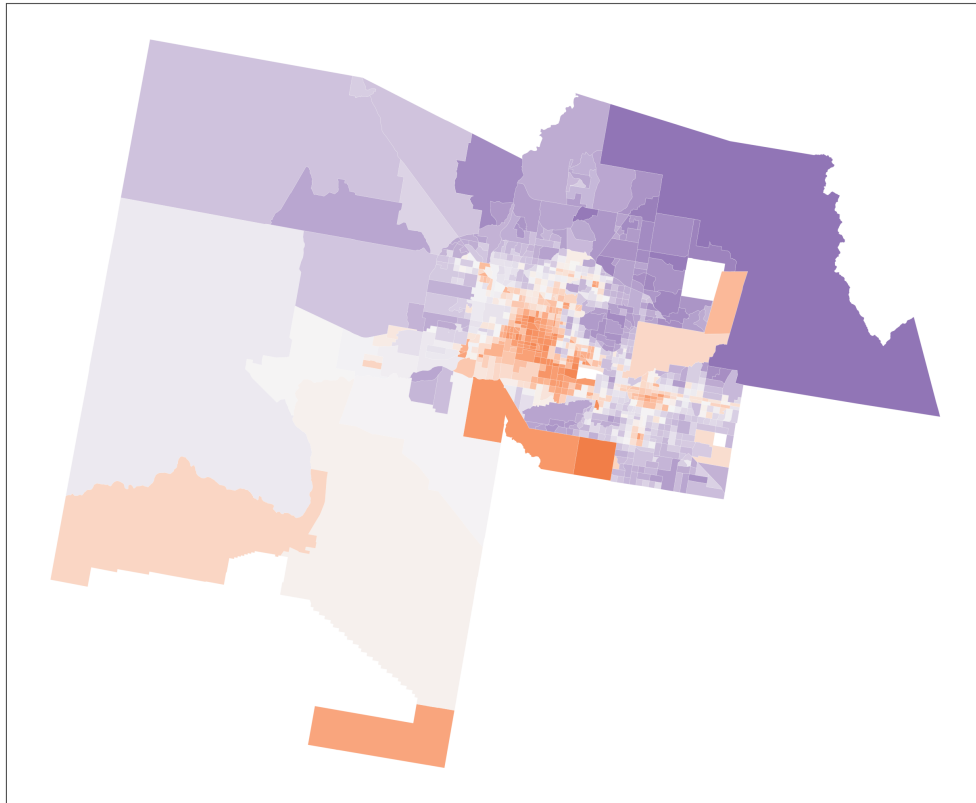

Difference from county average (County average: 44 | US average: 40)

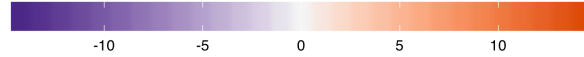

**Fig. S6.** Tract level estimates of heat risk perception for Maricopa County, AZ. Tracts are shaded by the difference from the average for the county.

San Diego County, California

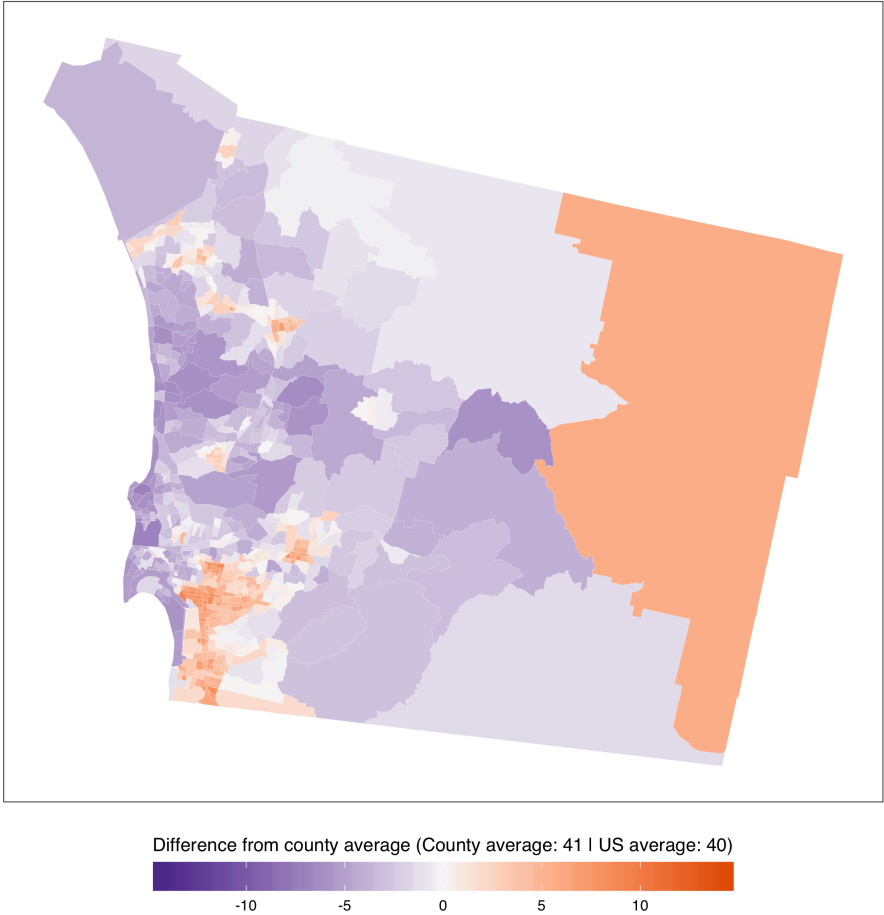

Fig. S7. Tract level estimates of heat risk perception for San Diego County, CA. Tracts are shaded by the difference from the average for the county.

Orange County, California

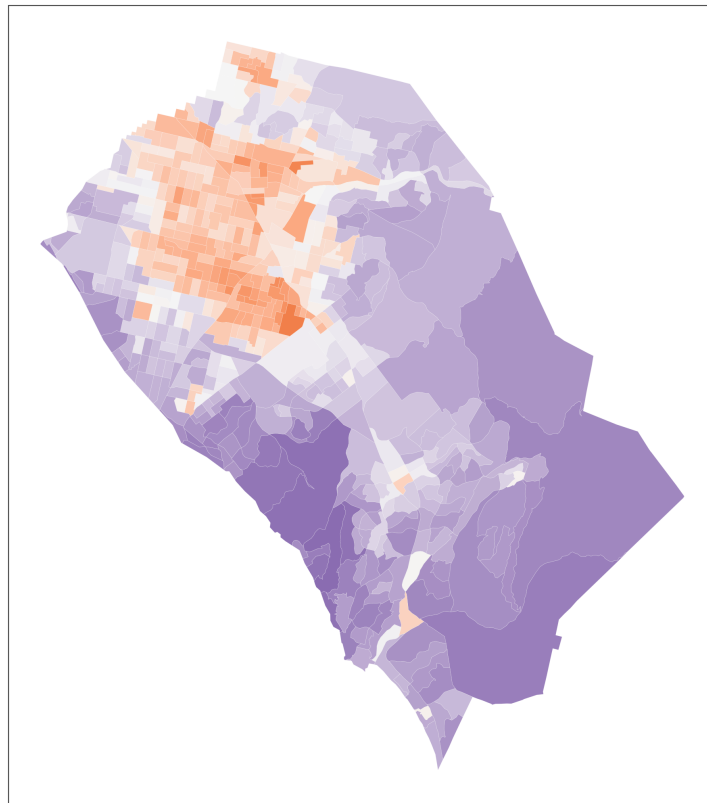

Difference from county average (County average: 42 | US average: 40)

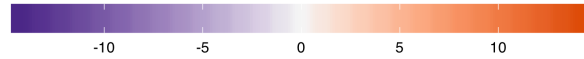

**Fig. S8.** Tract level estimates of heat risk perception for Orange County, CA. Tracts are shaded by the difference from the average for the county.

Miami-Dade County, Florida

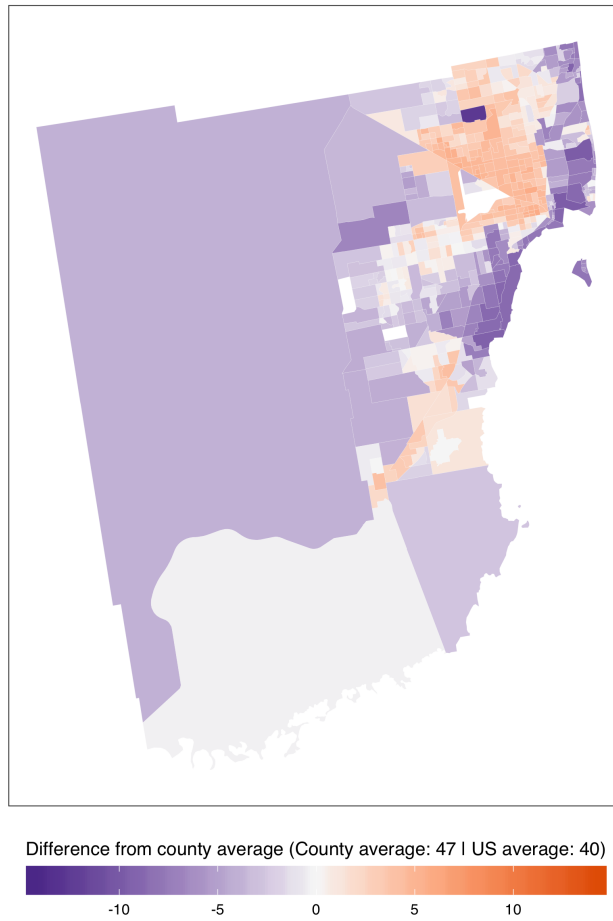

**Fig. S9.** Tract level estimates of heat risk perception for Miami-Dade County, FL. Tracts are shaded by the difference from the average for the county.

Kings County, New York

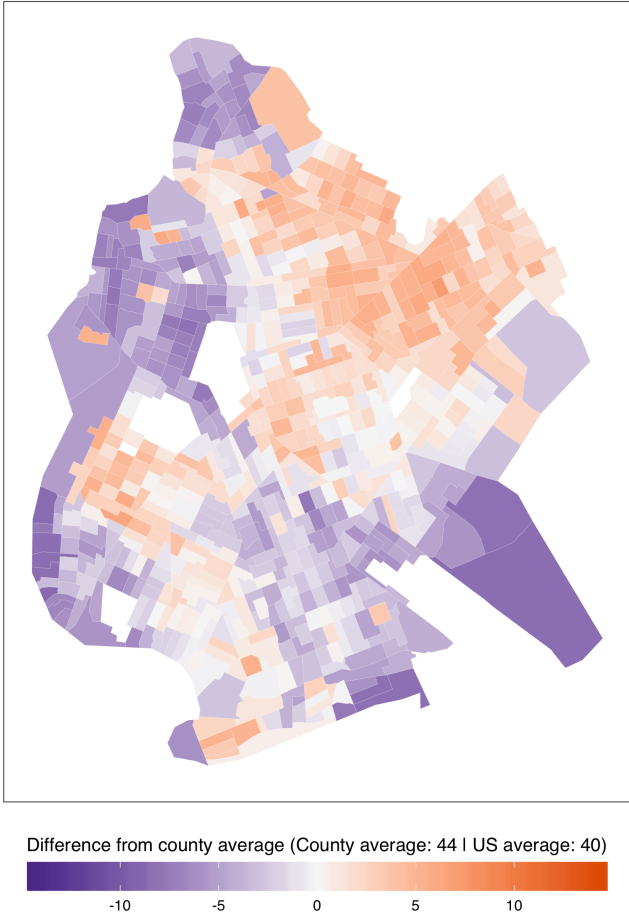

**Fig. S10.** Tract level estimates of heat risk perception for Kings County, NY. Tracts are shaded by the difference from the average for the county.

Dallas County, Texas

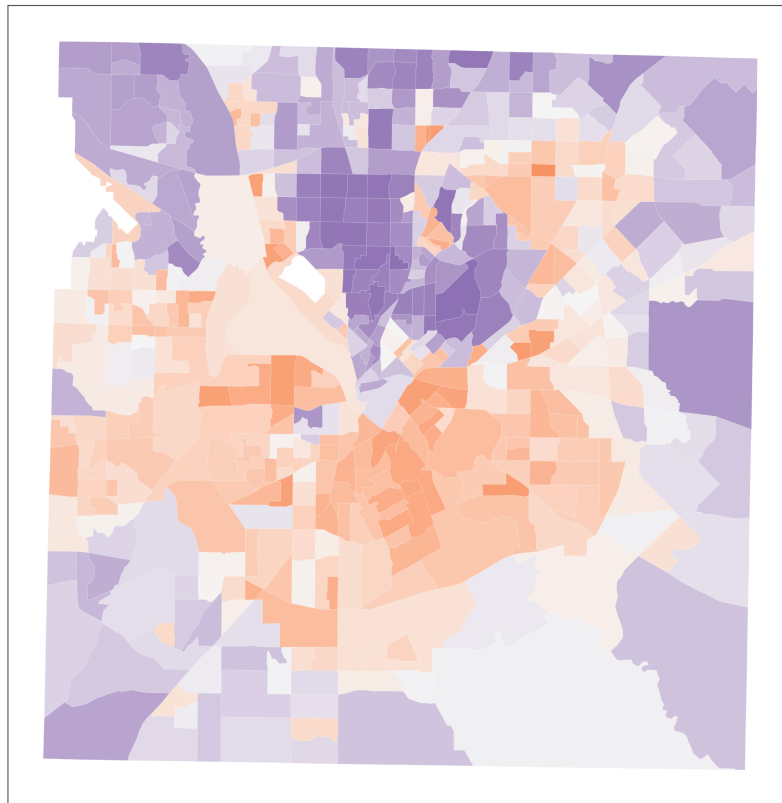

Difference from county average (County average: 47 | US average: 40)



**Fig. S11.** Tract level estimates of heat risk perception for Dallas County, TX. Tracts are shaded by the difference from the average for the county.



Riverside County, California

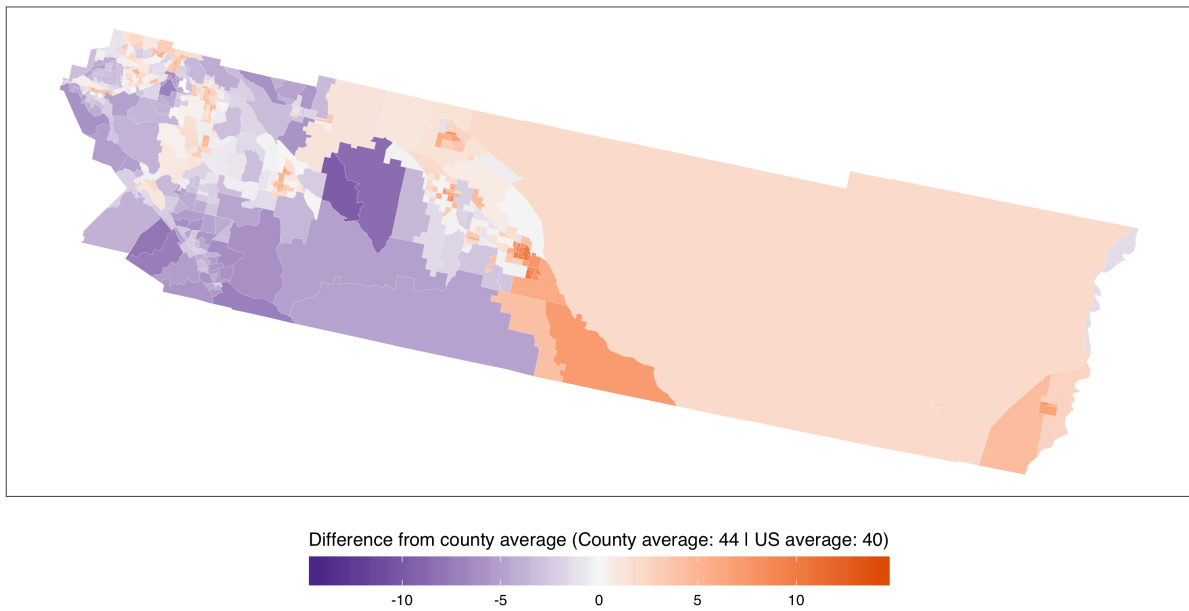

**Fig. S12.** Tract level estimates of heat risk perception for Riverside County, CA. Tracts are shaded by the difference from the average for the county.

Queens County, New York

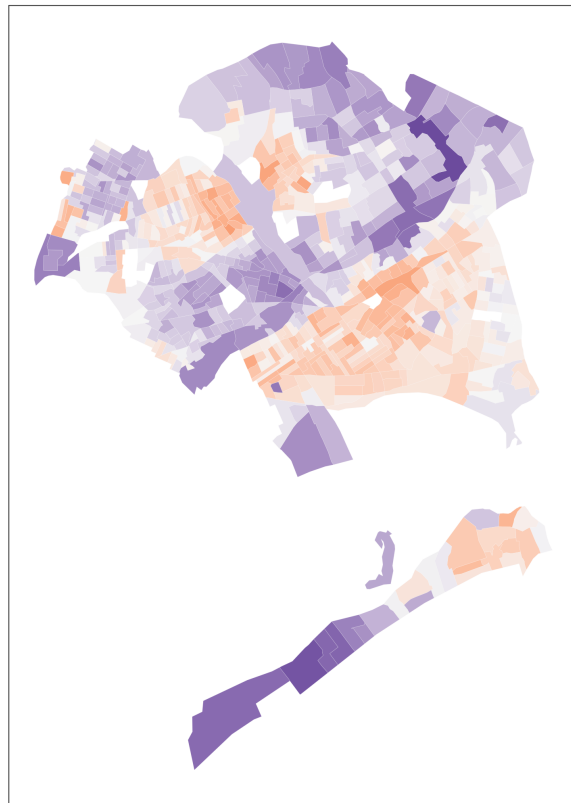

Difference from county average (County average: 47 | US average: 40)



**Fig. S13.** Tract level estimates of heat risk perception for Queens County, NY. Tracts are shaded by the difference from the average for the county.

Clark County, Nevada

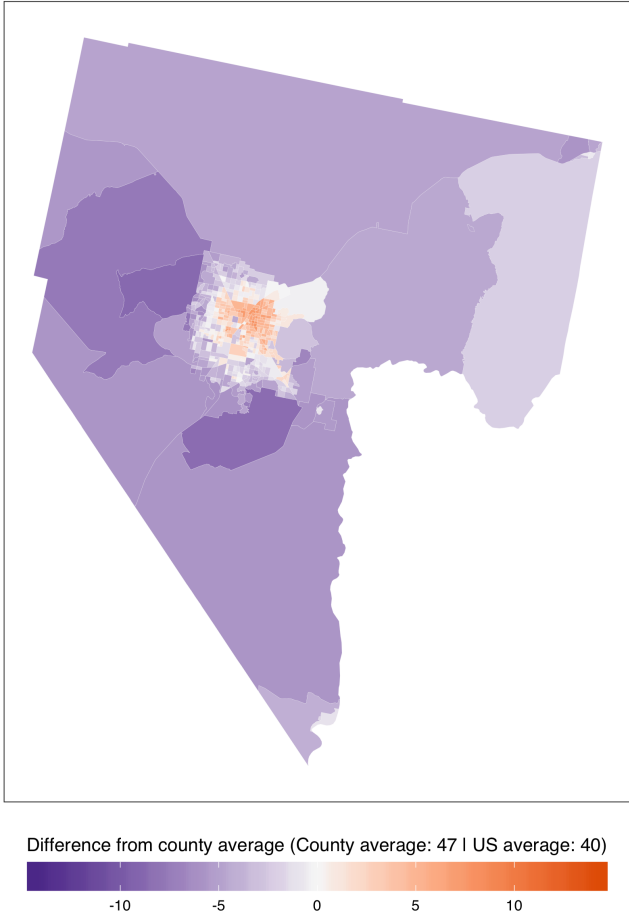

**Fig. S14.** Tract level estimates of heat risk perception for Clark County, NV. Tracts are shaded by the difference from the average for the county.

King County, Washington

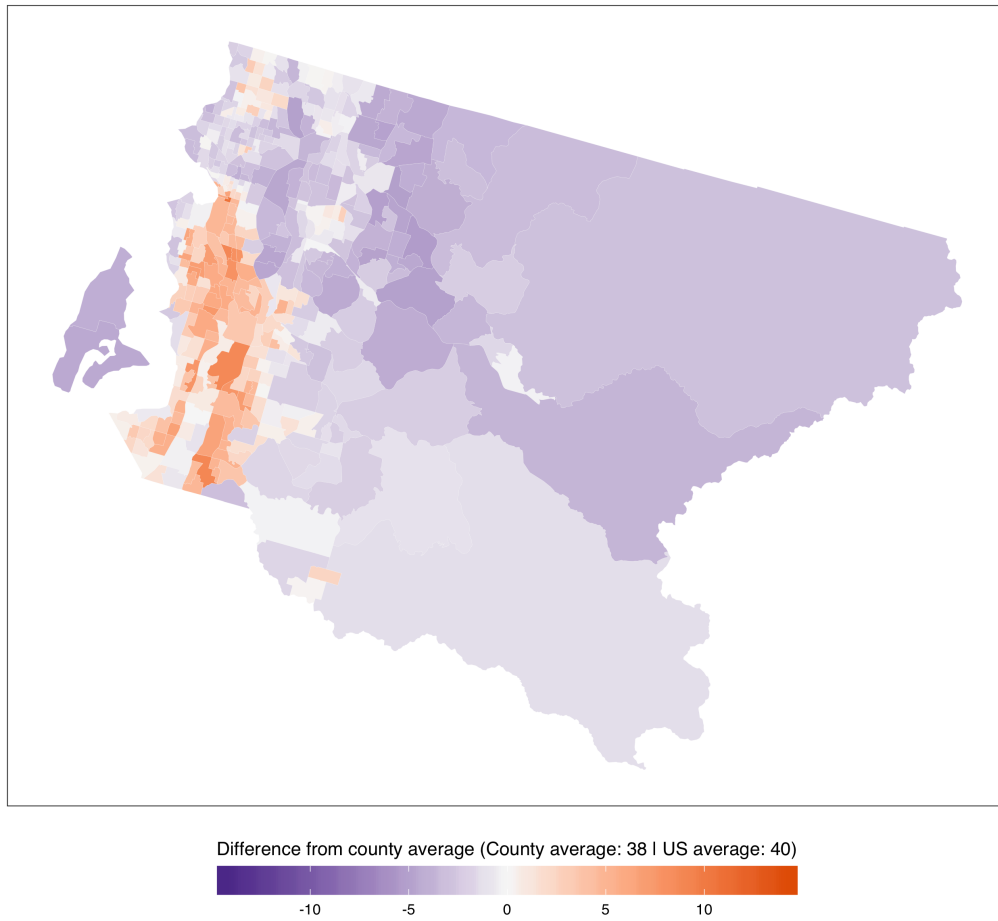

**Fig. S15.** Tract level estimates of heat risk perception for King County, WA. Tracts are shaded by the difference from the average for the county.

San Bernardino County, California

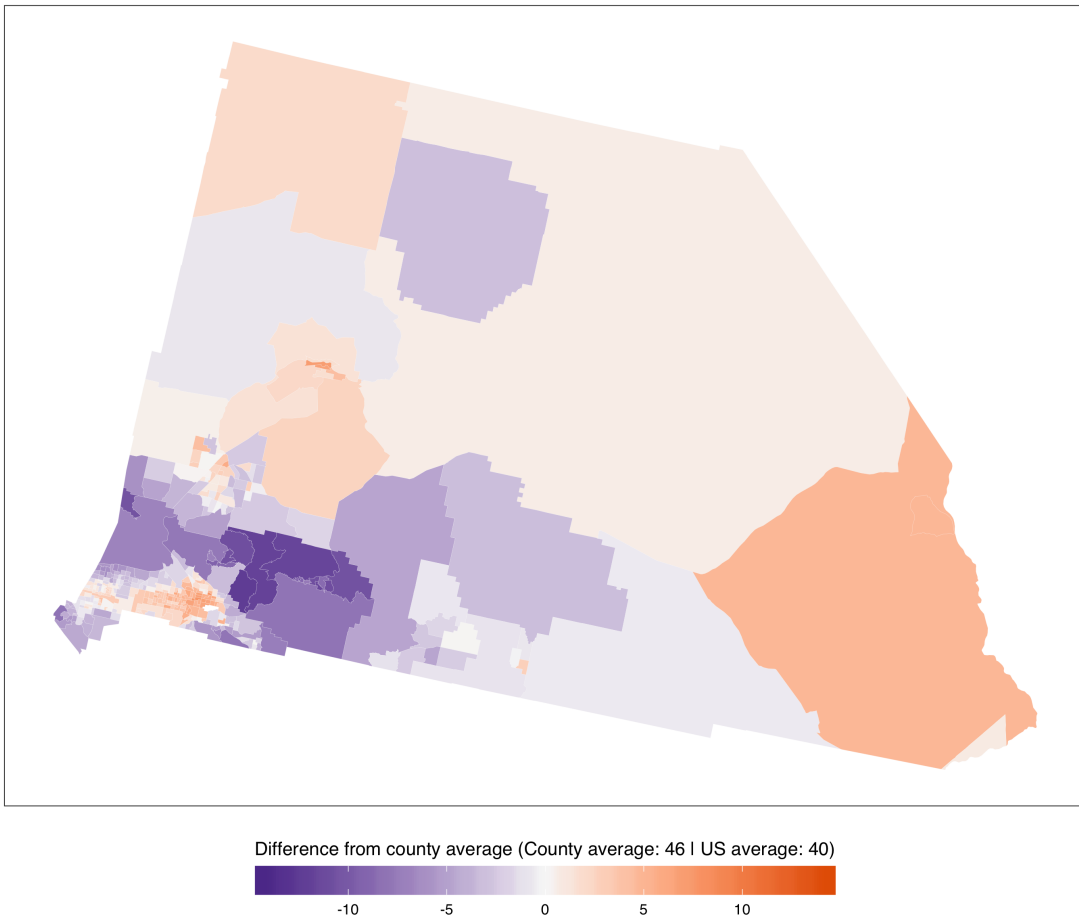

**Fig. S16.** Tract level estimates of heat risk perception for San Bernardino County, CA. Tracts are shaded by the difference from the average for the county.

Tarrant County, Texas

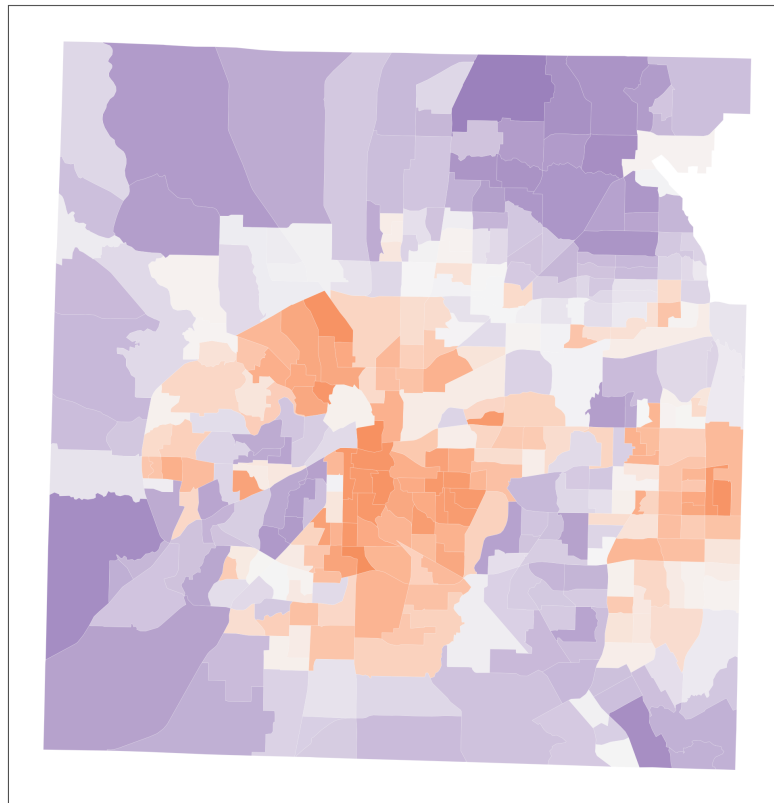

Difference from county average (County average: 41 | US average: 40)

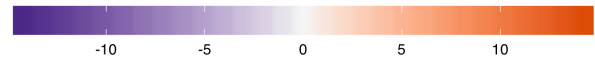

**Fig. S17.** Tract level estimates of heat risk perception for Tarrant County, TX. Tracts are shaded by the difference from the average for the county.

Bexar County, Texas

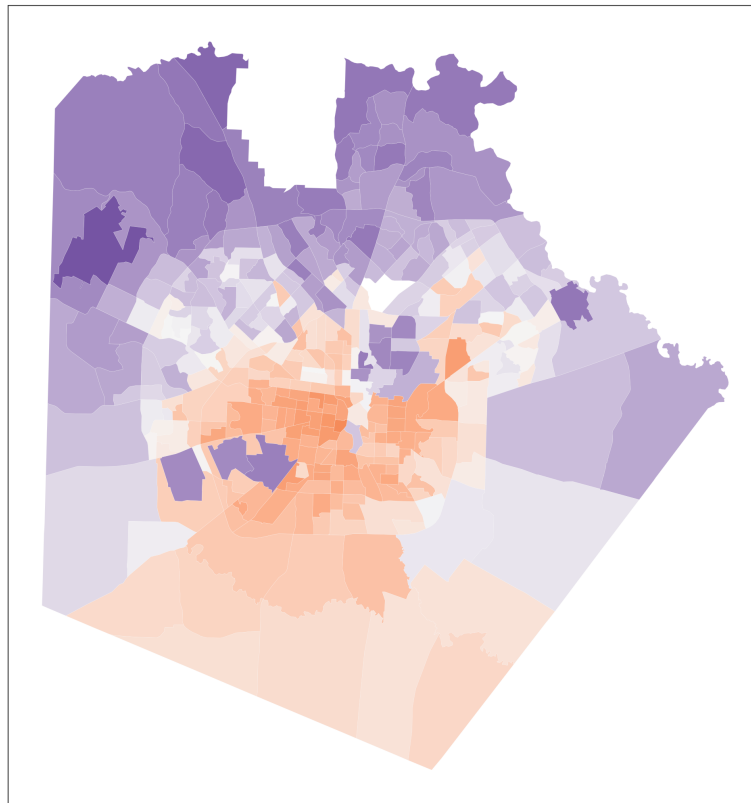

Difference from county average (County average: 45 | US average: 40)

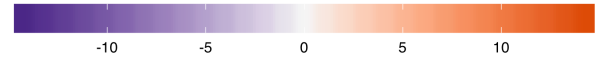

**Fig. S18.** Tract level estimates of heat risk perception for Bexar County, TX. Tracts are shaded by the difference from the average for the county.

Santa Clara County, California

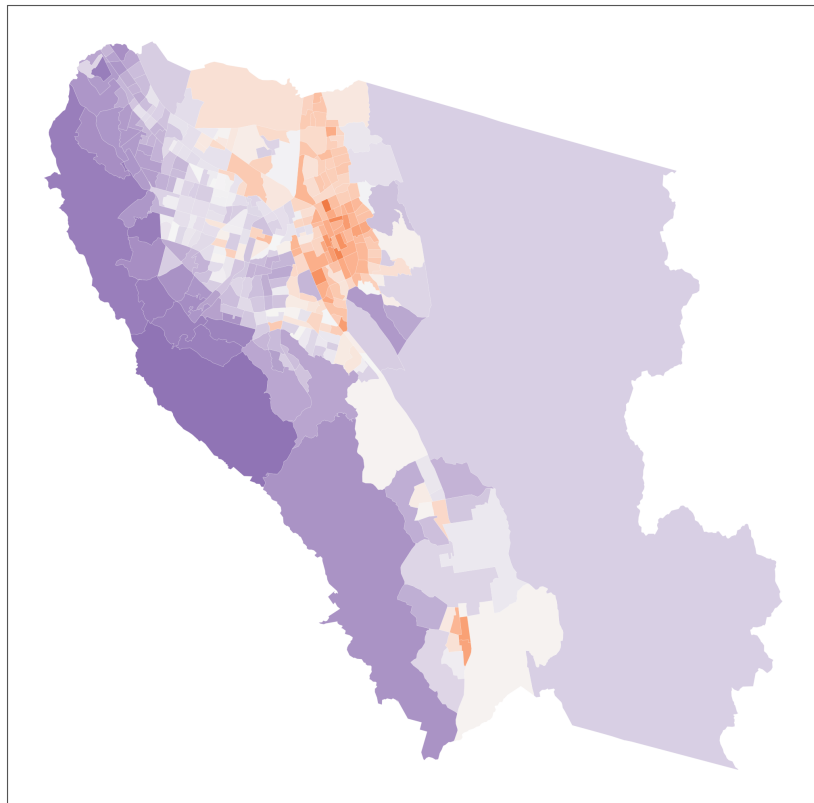

Difference from county average (County average: 41 | US average: 40)

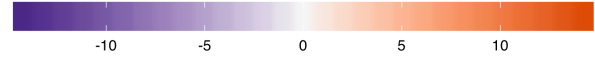

**Fig. S19.** Tract level estimates of heat risk perception for Santa Clara County, CA. Tracts are shaded by the difference from the average for the county.



Broward County, Florida

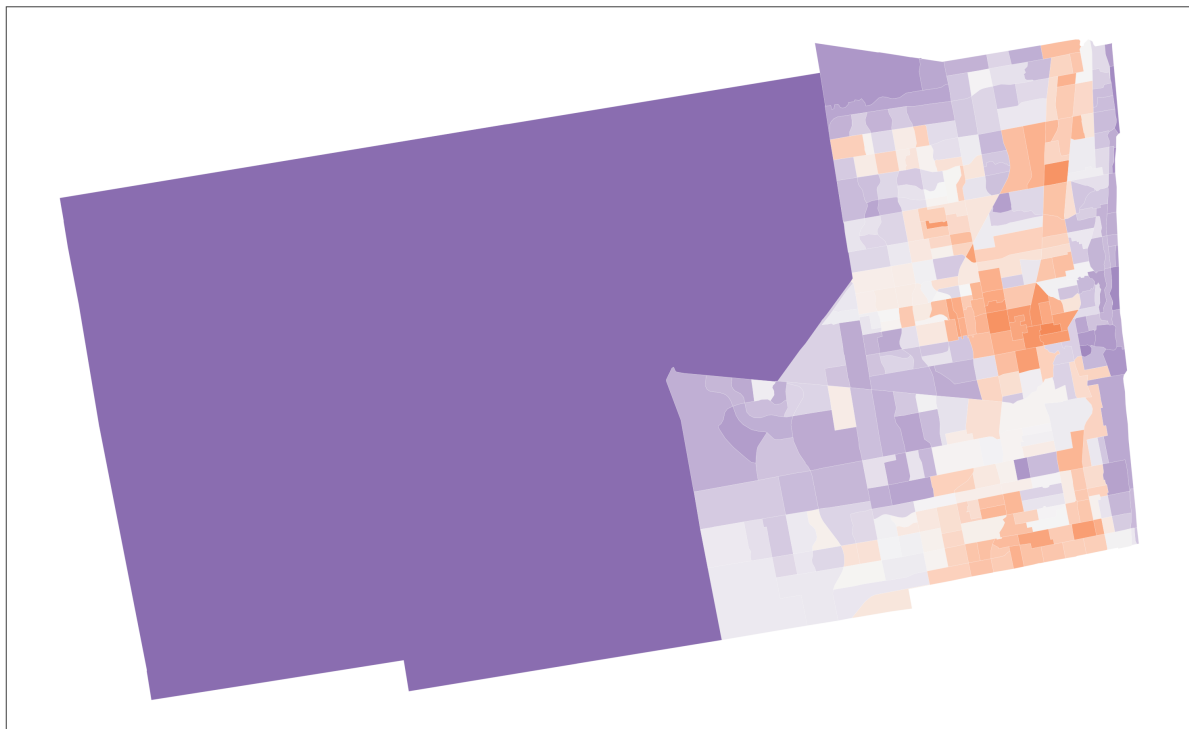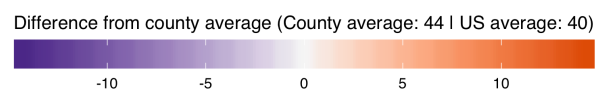

**Fig. S20.** Tract level estimates of heat risk perception for Broward County, FL. Tracts are shaded by the difference from the average for the county.

Wayne County, Michigan

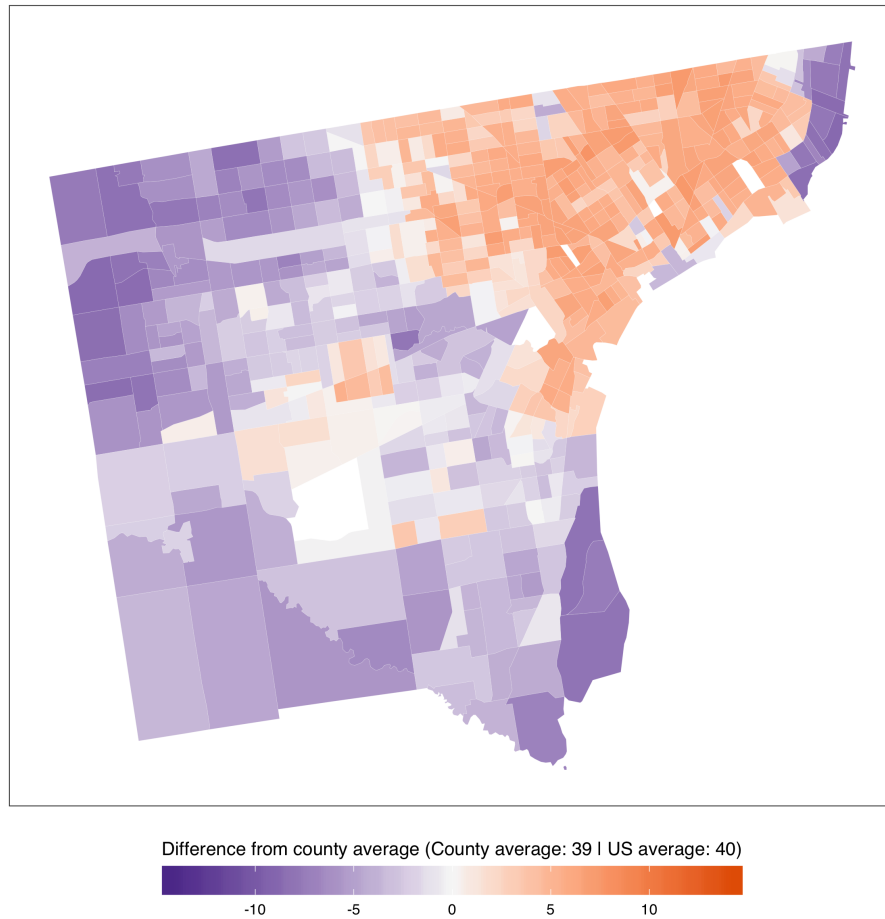

**Fig. S21.** Tract level estimates of heat risk perception for Wayne County, MI. Tracts are shaded by the difference from the average for the county.

New York County, New York

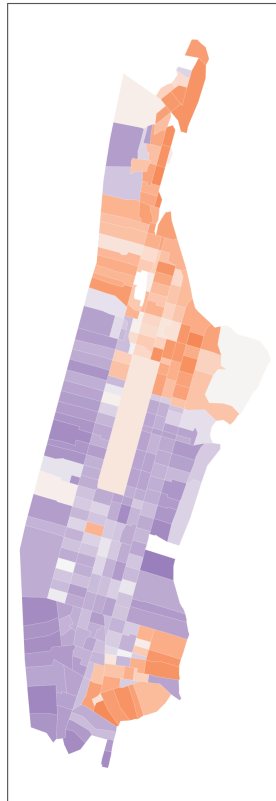

Difference from county average (County average: 42 | US average: 40)



**Fig. S22.** Tract level estimates of heat risk perception for New York County, NY. Tracts are shaded by the difference from the average for the county.

103 **References**

- 104 1. McDonald P, Mohebbi M, Slatkin B (2012) Comparing Google Consumer Surveys to Existing Probability and Non-Probability  
105 Based Internet Surveys, (Google White Paper), Technical report.
- 106 2. Santoso LP, Stein R, Stevenson R (2016) Survey Experiments with Google Consumer Surveys: Promise and Pitfalls for  
107 Academic Research in Social Science. *Political Analysis* 24(3):356–373.
- 108 3. Howe PD (2018) Modeling Geographic Variation in Household Disaster Preparedness across U.S. States and Metropolitan  
109 Areas. *The Professional Geographer* 70(3):491–503.
- 110 4. Dillman DA (2007) *Mail and Internet Surveys: The Tailored Design Method*. (J. Wiley, New York). Pages: xvi, 464 p  
111 Edition: 2nd ed Physical descrip: xvi, 464 p. : ill. ; 25 cm General Note: Rev. ed. of: Mail and telephone surveys. c1978  
112 Bibliography note: Includes bibliographical references and index Subject: Social surveys Subject: Questionnaires.
- 113 5. Centers for Disease Control and Prevention, National Center for Health Statistics (2016) Multiple Cause of Death 1999-2015  
114 on CDC WONDER Online Database, Technical report.
